# Supplementary material for: AKT-mediated phosphorylation of Sox9 induces Sox10 transcription in a murine model of HER2-positive breast cancer
Source: Springer Nature journal article supplement (doi:10.1186/s13058-021-01435-6), 2021-05-13
Supplement: MOESM3 [file 19161130]

**Table S1. List of Primers**

| <b>Primer</b>              | <b>Assay</b>         | <b>Forward Primer Sequence</b>           | <b>Reverse Primer Sequence</b>          |
|----------------------------|----------------------|------------------------------------------|-----------------------------------------|
| Sox10 promoter -6904/-5995 | Cloning              | GCGGTACCCTCTTCCTGTCCAA                   | CGCTCGAGAGCAGATCACATTGG                 |
| Sox10 promoter -4565/-3503 | Cloning              | GCGGTACCCTCCCTGATACCACAT                 | CGCTCGAGATACCCTGGGGTGCT                 |
| Sox10 promoter -3484/-2495 | Cloning              | GCGGTACCTATTGACCTGAGGTG                  | CGCTCGAGTCCCTCCTCTTGGAG                 |
| Sox10 promoter -1895/+359  | Cloning              | CCGGTACCTAGGCTGTAGAGGTGAG                | CCCTCGAGCATGTCGCTCCCGGCCG               |
| pGEX-Sox9                  | Cloning              | CAGGATCCAATCTCCTGGACCCCTTCATG            | CACTCGAGTCAGGGTCTGGTGAGCTG              |
| mSox9 S181A                | Mutagenesis          | GCCCCGGCGGAGGAAGGCGGTGAAGAACGGACAAGCGGAG | CTCCGCTTGCCGTTCTTCACCGCCTTCCTCCGCCGGGGC |
| Sox10 distal promoter      | Bisulfite Sequencing | ATTTATTTAGGGTTTGGTATGTGTA                | CCACCTTAATAAATCTTATTCTC                 |
| Sox10 proximal promoter    | Bisulfite Sequencing | ATTAGAGGTGGAGTTGAGTTTTGTG                | ATTCCTTCTTAACCTTACCCAATTC               |
| Sox8                       | qRT-PCR              | TGGAGTCTGGTGCCTATGCCTGT                  | GCCGAGCACTGCATCAGCTTTGT                 |
| Sox9                       | qRT-PCR              | CATCAAGACGGAGCAGCTGAG                    | ATGGTCAGCGTAGTCGTATTG                   |
| Sox10                      | qRT-PCR              | AGGTTGCTGAACGAAAGTGAC                    | CCGAGGTTGGTACTTGTAGTCC                  |
| Sox10 3' UTR               | qRT-PCR              | CATCTAGAAGGGGCCCTGTCACCA                 | CAGGATCCCAGGTCAGGCCACCAAG               |
| Sox10 promoter -6642       | ChIP qRT-PCR         | TGGGACCCGACGGCGGCGGCGGTG                 | CTTGCTCTTGCTGGCACCGTTGAC                |
| Sox10 promoter -6175       | ChIP qRT-PCR         | CCCTCGCTCTGTCCAGATTAATG                  | AGCAGATCACATTGGTAGACATGTAG              |
| Sox10 promoter -150        | ChIP qRT-PCR         | ACAGAGATGAGCCATGTGAAAATAAG               | AGCTGTCAGCAGCCTGGCAAGGG                 |
