# Supplementary material for: AKT-mediated phosphorylation of Sox9 induces Sox10 transcription in a murine model of HER2-positive breast cancer
Source: Springer Nature journal article supplement (doi:10.1186/s13058-021-01435-6), 2021-05-13
Supplement: MOESM4 [file 19161130]

**Supplemental Table 2: Antibodies**

| <b>Antibody</b>      | <b>Company</b>            | <b>Catalog Number</b> | <b>Western Blot</b> | <b>IHC-P</b> |
|----------------------|---------------------------|-----------------------|---------------------|--------------|
| anti-SLK             | custom made               | -                     | 1:10000             | 1:500        |
| anti- $\beta$ -actin | Sigma                     | A5316                 | 1:20000             | -            |
| anti-Sox10           | Novus                     | NBP2-44474            | -                   | 1:400        |
| anti-Sox10           | Cell Signaling Technology | 89356                 | 1:1000              | -            |
| anti-Sox9            | Novus                     | NBP1-8555             | 1:2000              | -            |
| anti-pSox9 S181      | Abcam                     | ab59252               | 1:500               | 1:100        |
| anti-pAKT S473       | Cell Signaling Technology | 4060                  | 1:1000              | -            |
| anti-AKT             | Cell Signaling Technology | 9272                  | 1:2000              | -            |
| anti-CREB            | Cell Signaling Technology | 9197                  | 1:1000              | -            |
| anti-FoxA1           | Cell Signaling Technology | 53528                 | 1:1000              | -            |
| anti-FoxO1           | Cell Signaling Technology | 2880                  | 1:1000              | -            |
| anti-FoxO3A          | Cell Signaling Technology | 12829                 | 1:1000              | -            |
| anti-Lamin A/C       | Cell Signaling Technology | 4744                  | 1:2000              | -            |
| anti-GAPDH           | Cell Signaling Technology | 2118                  | 1:2000              | -            |
| anti-K27 acetyl-H3   | Abcam                     | 4729                  | -                   | -            |
