# Supplementary material for: AKT-mediated phosphorylation of Sox9 induces Sox10 transcription in a murine model of HER2-positive breast cancer
Source: Springer Nature journal article supplement (doi:10.1186/s13058-021-01435-6), 2021-05-13
Supplement: MOESM5 [file 19161130]

Supplemental Table 3: Akt siRNAs (Sigma)

| <b>siRNA</b>  | <b>Sequence</b>       |
|---------------|-----------------------|
| Non Targeting | CAGUCGCGUUUGCGACUGG   |
| AKT1.1        | AACGAUGGCACCUUUAUUGGC |
| AKT1.2        | AACCAGGACCACGAGAAGCUG |
| AKT2.1        | AAACUCCUCGGCAAGGGCACC |
| AKT2.2        | AAGAGUGGAUGCGGGCUAUCC |
| AKT3.1        | AAGGAUGAAGUGGCACACACU |
| AKT3.2        | AAGAGGGUUGGGUUCAGAAGA |
